# Supplementary material for: The Influence of Physician Information on Patients’ Choice of Physician in mHealth Services Using China’s Chunyu Doctor App: Eye-Tracking and Questionnaire Study
Source: PubMed Central journal article supplement (PMC6913723; doi:10.2196/15544), 2019-10-23
Supplement: mhealth_v7i10e15544_app1.pdf [file mhealth_v7i10e15544_app1.pdf]

**Table A. Physician Information Level**

| Physician information     | High level                                                                                      | Low level                                                             |
|---------------------------|-------------------------------------------------------------------------------------------------|-----------------------------------------------------------------------|
| Hospital                  | Class A tertiary hospital                                                                       | General hospital                                                      |
| Title                     | Chief physician                                                                                 | Physician                                                             |
| Educational background    | Doctor of Medicine, Professor                                                                   | Bachelor degree                                                       |
| Academic research results | Published 20 papers and presided 3 projects of the National Natural Science Foundation of China | No specific academic research results                                 |
| Topic                     | 10 topics                                                                                       | 0 topic                                                               |
| Fees                      | CNY ¥60 for graphic consultation, CNY ¥100 for telephone consultation                           | CNY ¥60 for graphic consultation, CNY ¥100 for telephone consultation |
| Peer evaluations          | 100 points                                                                                      | 98 points                                                             |
| Consultation numbers      | 10815 times                                                                                     | 623 times                                                             |
| Favorability rate         | 99.7%                                                                                           | 90.3%                                                                 |
| Satisfaction              | Satisfaction (2857 times), unsatisfactory (41 times)                                            | Satisfaction (83 times), unsatisfactory (10 times)                    |
| Gratitude expressed       | 552 times                                                                                       | 3 times                                                               |
