# Supplementary material for: The Influence of Physician Information on Patients’ Choice of Physician in mHealth Services Using China’s Chunyu Doctor App: Eye-Tracking and Questionnaire Study
Source: PubMed Central journal article supplement (PMC6913723; doi:10.2196/15544), 2019-10-23
Supplement: mhealth_v7i10e15544_app2.pdf [file mhealth_v7i10e15544_app2.pdf]

**Table B. Demographic characteristics of the participants (N=254)**

| Characteristic                            | Number of participants, n (%) |
|-------------------------------------------|-------------------------------|
| <b>Gender</b>                             |                               |
| Male                                      | 113 (44.5)                    |
| Female                                    | 141 (55.5)                    |
| <b>Age</b>                                |                               |
| 20                                        | 7 (2.8)                       |
| 20-30                                     | 215 (84.6)                    |
| 30-40                                     | 18 (7.1)                      |
| 40                                        | 14 (5.5)                      |
| <b>Education level</b>                    |                               |
| High school and below                     | 11 (4.3)                      |
| Specialist college                        | 6 (2.4)                       |
| Undergraduate degree                      | 84 (33.1)                     |
| Master's degree and higher                | 153 (60.2)                    |
| <b>Online Shopping Age</b>                |                               |
| 0 year                                    | 0 (0)                         |
| 1-5 years                                 | 85 (33.5)                     |
| 5-10 years                                | 141 (55.5)                    |
| Over 10 years                             | 28 (11)                       |
| <b>Frequency of using mHealth service</b> |                               |
| Once or more a week                       | 45 (17.7)                     |
| Once a month                              | 25 (9.8)                      |
| Once in two months or even longer         | 77 (30.3)                     |
| Never                                     | 107 (42.1)                    |
